# Supplementary material for: Hesperetin ameliorates hepatic oxidative stress and inflammationviathe PI3K/AKT-Nrf2-ARE pathway in oleic acid-induced HepG2 cells and a rat model of high-fat diet-induced NAFLD
Source: Royal Society of Chemistry journal article supplement (doi:10.1039/d0fo02736g), 2021-01-01
Supplement: d0fo02736g1.pdf [file d0fo02736g1.pdf]

**Table S1 The compositions of the standard diet and the high-fat diet**

| <b>Ingredient</b>   | <b>Standard diet</b> | <b>High-fat diet</b> |
|---------------------|----------------------|----------------------|
| Casein, 30 Mesh     | 140 g (560 kcal)     | 200 g (800 kcal)     |
| L-Cystine           | 1.8 g (7.2 kcal)     | 3 g (12 kcal)        |
| Corn Starch         | 495.7 g (1983 kcal)  | 72.8 g (291 kcal)    |
| Maltodextrin 10     | 125 g (500 kcal)     | 100 g (400 kcal)     |
| Sucrose             | 100 g (400 kcal)     | 172.8 g (691 kcal)   |
| Cellulose, BW200    | 50 g (0 kcal)        | 50 g (0 kcal)        |
| Soybean Oil         | 40 g (360 kcal)      | 25 g (225 kcal)      |
| Lard                | 0 g (0 kcal)         | 177.5 g (1598 kcal)  |
| t-Butylhydroquinone | 0.008 g (0 kcal)     | 0 g (0 kcal)         |
| Mineral Mix S10022M | 35 g (0 kcal)        | 0 g (0 kcal)         |
| Mineral Mix S10026  | 0 g (0 kcal)         | 10 g (0 kcal)        |
| DiCalcium Phosphate | 0 g (0 kcal)         | 13 g (0 kcal)        |
| Calcium Carbonate   | 0 g (0 kcal)         | 5.5 g (0 kcal)       |
| H <sub>2</sub> O    | 0 g (0 kcal)         | 16.5 g (0 kcal)      |
| Vitamin Mix V10037  | 10 g (40 kcal)       | 0 g (0 kcal)         |
| Vitamin Mix V10001  | 0 g (0 kcal)         | 10 g (40 kcal)       |
| Choline Bitartrate  | 2.5 g (0 kcal)       | 2 g (0 kcal)         |
| FD&C Red Dye #40    | 0 g (0 kcal)         | 0.05 g (0 kcal)      |
| Cholesterol         | 0 g (0 kcal)         | 18 g (0 kcal)        |
| Total               | 1000 g (3850 kcal)   | 876.15 g (4057 kcal) |
